# Supplementary material for: Brain Volume in Fetal Alcohol Spectrum Disorders Over a 20-Year Span
Source: PubMed Central journal article supplement (PMC10656646; doi:10.1001/jamanetworkopen.2023.43618), 2023-11-17
Supplement: jamanetwopen-e2343618-s001.pdf [file jamanetwopen-e2343618-s001.pdf]

## Supplemental Online Content

Pfefferbaum A, Sullivan EV, Pohl KM, et al. Brain volume in fetal alcohol spectrum disorders over a 20-year span. *JAMA Netw Open*. 2023;6(11):e2343618.  
doi:10.1001/jamanetworkopen.2023.43618

**eTable 1.** Comparison of Returners vs Nonreturners

**eTable 2.** Mean, SD, SE, and N for Nonreturners and Returners by Group

**eTable 3.** Tests for Control-by-FAE or FAS Interaction of Returners vs Nonreturners

**eFigure 1.** Intracranial Volumes (ICV) for Returning vs Nonreturning Participants

**eFigure 2.** Volumes of Cortical Regions for Returning vs Nonreturning Participants

**eFigure 3.** White Matter and Ventricular Measures for Returning vs Nonreturning Participants

**eFigure 4.** Demographic Data for Returning vs Nonreturning Participants

**eFigure 5.** Raw and ICV-Corrected Volumes of Cortical Gray Matter Regions at Each MRI Session

**eFigure 6.** Raw and ICV-Corrected Volumes of White Matter Regions at Each MRI Session

**eFigure 7.** Raw and ICV-Corrected Volumes of Cerebellar Regions at Each MRI Session

This supplemental material has been provided by the authors to give readers additional information about their work.

20 October 2023

| eTable 1. Comparison of Returners vs. Non-returners |         |             |       |             |       |      |
|-----------------------------------------------------|---------|-------------|-------|-------------|-------|------|
|                                                     | Control |             | FAE   |             | FAS   |      |
|                                                     | t       | p           | t     | p           | t     | p    |
| ICV                                                 | -0.41   | 0.69        | 0.69  | 0.50        | 0.32  | 0.75 |
| <b>Gray matter volume</b>                           |         |             |       |             |       |      |
| Frontal                                             | -0.21   | 0.84        | 0.13  | 0.90        | 0.77  | 0.45 |
| Temporal                                            | -0.47   | 0.64        | 1.32  | 0.19        | 0.40  | 0.69 |
| Parietal                                            | 0.41    | 0.68        | 0.17  | 0.87        | -0.52 | 0.60 |
| Occipital                                           | -0.76   | 0.45        | -0.33 | 0.74        | -0.06 | 0.95 |
| Insula                                              | -1.13   | 0.26        | 0.08  | 0.94        | 0.81  | 0.42 |
| Cingulate                                           | -1.27   | 0.21        | 0.30  | 0.76        | 0.41  | 0.69 |
| <b>White matter volume</b>                          |         |             |       |             |       |      |
| Centrum semiovale                                   | -0.68   | 0.50        | 0.09  | 0.93        | 0.20  | 0.84 |
| Corpus callosum                                     | -0.41   | 0.68        | -1.62 | 0.11        | 0.08  | 0.94 |
| Pons                                                | -0.90   | 0.37        | 0.25  | 0.80        | -0.45 | 0.66 |
| <b>Ventricular volume</b>                           |         |             |       |             |       |      |
| Lateral                                             | 0.34    | 0.73        | 0.06  | 0.96        | 0.12  | 0.90 |
| Third                                               | -0.16   | 0.87        | 2.42  | <b>0.02</b> | 0.93  | 0.36 |
| <b>Demographics</b>                                 |         |             |       |             |       |      |
| Educational level                                   | 0.63    | 0.53        | 2.36  | <b>0.02</b> | 1.15  | 0.26 |
| BMI                                                 | -0.47   | 0.64        | -0.53 | 0.60        | -0.16 | 0.87 |
| Handedness                                          | 0.17    | 0.87        | 1.05  | 0.30        | 1.45  | 0.15 |
| VIQ prorated                                        | 2.19    | <b>0.03</b> | 2.59  | <b>0.01</b> | 1.16  | 0.25 |
| PIQ                                                 | 1.95    | 0.06        | 1.93  | 0.06        | 1.73  | 0.09 |
| FSIQ prorated                                       | 2.27    | <b>0.03</b> | 2.73  | <b>0.01</b> | 1.60  | 0.12 |
| PIQ-VIQ discrepancy                                 | 0.33    | 0.74        | -0.46 | 0.65        | 0.90  | 0.37 |

Bonferroni correct for 18 comparisons with  $\alpha=0.05$  (2-tailed) requires  $p=0.0028$ .

Thus, none of the uncorrected p-values met correction for multiple comparisons.

| eTable 2. Mean, SD, SE, and N for Non-returned and Returners by group |              |         |        |       |          |         |        |       |
|-----------------------------------------------------------------------|--------------|---------|--------|-------|----------|---------|--------|-------|
|                                                                       | Control      |         |        |       |          |         |        |       |
|                                                                       | Non-returned |         |        |       | Returner |         |        |       |
|                                                                       | N            | Mean    | SD     | SE    | N        | Mean    | SD     | SE    |
| ICV                                                                   | 33           | 1558.33 | 179.55 | 31.25 | 26       | 1541.59 | 123.96 | 24.31 |
| <b>Gray matter volume</b>                                             |              |         |        |       |          |         |        |       |
| Frontal                                                               | 33           | 179.75  | 21.10  | 3.67  | 26       | 178.72  | 15.61  | 3.06  |
| Temporal                                                              | 33           | 14.48   | 1.80   | 0.31  | 26       | 14.01   | 1.25   | 0.25  |
| Parietal                                                              | 33           | 23.17   | 3.63   | 0.63  | 26       | 22.04   | 3.01   | 0.59  |
| Occipital                                                             | 33           | 61.45   | 7.01   | 1.22  | 26       | 60.12   | 6.32   | 1.24  |
| Insula                                                                | 33           | 84.10   | 9.13   | 1.59  | 26       | 85.02   | 7.67   | 1.50  |
| Cingulate                                                             | 33           | 106.48  | 13.12  | 2.28  | 26       | 105.04  | 9.81   | 1.92  |
| <b>White matter volume</b>                                            |              |         |        |       |          |         |        |       |
| Centrum semiovale                                                     | 33           | 128.82  | 19.46  | 3.39  | 26       | 125.91  | 10.81  | 2.12  |
| Corpus callosum                                                       | 33           | 15.79   | 3.13   | 0.55  | 26       | 15.51   | 1.69   | 0.33  |
| Pons                                                                  | 33           | 8.54    | 1.32   | 0.23  | 26       | 8.24    | 1.15   | 0.23  |
| <b>Ventricular volume</b>                                             |              |         |        |       |          |         |        |       |
| Lateral                                                               | 33           | 10.90   | 4.15   | 0.72  | 26       | 11.25   | 3.46   | 0.68  |
| Third                                                                 | 33           | 1.24    | 0.17   | 0.03  | 26       | 1.23    | 0.18   | 0.04  |
| <b>Demographics</b>                                                   |              |         |        |       |          |         |        |       |
| Educational level                                                     | 33           | 11.52   | 2.71   | 0.47  | 26       | 11.96   | 2.71   | 0.53  |
| BMI                                                                   | 33           | 25.49   | 4.28   | 0.75  | 25       | 24.97   | 4.14   | 0.83  |
| Handedness                                                            | 33           | 0.03    | 0.17   | 0.03  | 26       | 0.04    | 0.20   | 0.04  |
| VIQ prorated                                                          | 33           | 105.33  | 12.33  | 2.15  | 26       | 112.00  | 10.60  | 2.08  |
| PIQ                                                                   | 33           | 105.39  | 15.53  | 2.70  | 26       | 113.12  | 14.48  | 2.84  |
| FSIQ prorated                                                         | 33           | 105.88  | 13.65  | 2.38  | 26       | 113.81  | 12.93  | 2.54  |
| PIQ-VIQ discrepancy                                                   | 33           | 0.06    | 13.51  | 2.35  | 26       | 1.12    | 9.95   | 1.95  |
|                                                                       |              |         |        |       |          |         |        |       |
|                                                                       | FAE          |         |        |       |          |         |        |       |
|                                                                       | Non-returned |         |        |       | Returner |         |        |       |
|                                                                       | N            | Mean    | SD     | SE    | N        | Mean    | SD     | SE    |
| ICV                                                                   | 40           | 1425.53 | 179.67 | 28.41 | 18       | 1458.35 | 140.17 | 33.04 |
| <b>Gray matter volume</b>                                             |              |         |        |       |          |         |        |       |
| Frontal                                                               | 40           | 164.23  | 23.92  | 3.78  | 18       | 165.10  | 22.76  | 5.36  |
| Temporal                                                              | 40           | 13.25   | 1.94   | 0.31  | 18       | 13.29   | 1.78   | 0.42  |
| Parietal                                                              | 40           | 20.83   | 3.74   | 0.59  | 18       | 21.14   | 3.30   | 0.78  |
| Occipital                                                             | 40           | 57.04   | 8.43   | 1.33  | 18       | 56.27   | 7.64   | 1.80  |
| Insula                                                                | 40           | 79.72   | 10.07  | 1.59  | 18       | 80.21   | 10.37  | 2.45  |
| Cingulate                                                             | 40           | 97.70   | 12.24  | 1.93  | 18       | 102.36  | 12.75  | 3.01  |
| <b>White matter volume</b>                                            |              |         |        |       |          |         |        |       |
| Centrum semiovale                                                     | 40           | 114.84  | 17.75  | 2.81  | 18       | 115.25  | 12.73  | 3.00  |
| Corpus callosum                                                       | 40           | 14.30   | 2.75   | 0.43  | 18       | 13.13   | 1.96   | 0.46  |
| Pons                                                                  | 40           | 7.51    | 1.15   | 0.18  | 18       | 7.59    | 1.09   | 0.26  |
| <b>Ventricular volume</b>                                             |              |         |        |       |          |         |        |       |
| Lateral                                                               | 40           | 11.06   | 7.46   | 1.18  | 18       | 11.16   | 3.01   | 0.71  |
| Third                                                                 | 40           | 1.13    | 0.18   | 0.03  | 18       | 1.28    | 0.30   | 0.07  |
| <b>Demographics</b>                                                   |              |         |        |       |          |         |        |       |
| Educational level                                                     | 40           | 9.83    | 1.80   | 0.28  | 18       | 11.06   | 1.92   | 0.45  |
| BMI                                                                   | 40           | 26.24   | 6.34   | 1.00  | 18       | 25.28   | 6.66   | 1.57  |
| Handedness                                                            | 40           | 0.08    | 0.27   | 0.04  | 18       | 0.17    | 0.38   | 0.09  |
| VIQ prorated                                                          | 40           | 79.63   | 13.41  | 2.12  | 18       | 89.06   | 11.45  | 2.70  |
| PIQ                                                                   | 39           | 85.10   | 15.79  | 2.53  | 18       | 93.78   | 15.84  | 3.73  |
| FSIQ prorated                                                         | 39           | 79.77   | 14.33  | 2.29  | 18       | 90.39   | 11.96  | 2.82  |
| PIQ-VIQ discrepancy                                                   | 39           | 6.18    | 10.31  | 1.65  | 18       | 4.72    | 12.66  | 2.98  |
|                                                                       |              |         |        |       |          |         |        |       |
|                                                                       | FAS          |         |        |       |          |         |        |       |
|                                                                       | Non-returned |         |        |       | Returner |         |        |       |
|                                                                       | N            | Mean    | SD     | SE    | N        | Mean    | SD     | SE    |
| ICV                                                                   | 36           | 1347.48 | 200.49 | 33.42 | 22       | 1363.92 | 174.77 | 37.26 |
| <b>Gray matter volume</b>                                             |              |         |        |       |          |         |        |       |
| Frontal                                                               | 36           | 153.92  | 23.05  | 3.84  | 22       | 158.74  | 23.56  | 5.02  |
| Temporal                                                              | 36           | 12.66   | 1.64   | 0.27  | 22       | 13.06   | 2.09   | 0.45  |
| Parietal                                                              | 36           | 20.07   | 3.80   | 0.63  | 22       | 20.47   | 3.32   | 0.71  |
| Occipital                                                             | 36           | 53.97   | 9.67   | 1.61  | 22       | 53.83   | 7.96   | 1.70  |
| Insula                                                                | 36           | 75.53   | 12.65  | 2.11  | 22       | 73.78   | 11.89  | 2.54  |
| Cingulate                                                             | 36           | 94.26   | 13.69  | 2.28  | 22       | 95.71   | 13.30  | 2.84  |
| <b>White matter volume</b>                                            |              |         |        |       |          |         |        |       |
| Centrum semiovale                                                     | 36           | 106.13  | 20.97  | 3.49  | 22       | 107.25  | 19.09  | 4.07  |
| Corpus callosum                                                       | 36           | 12.70   | 3.09   | 0.52  | 22       | 12.77   | 3.37   | 0.72  |
| Pons                                                                  | 36           | 6.90    | 1.38   | 0.23  | 22       | 6.75    | 0.93   | 0.20  |
| <b>Ventricular volume</b>                                             |              |         |        |       |          |         |        |       |
| Lateral                                                               | 36           | 9.48    | 3.97   | 0.66  | 22       | 9.63    | 4.76   | 1.01  |
| Third                                                                 | 36           | 1.06    | 0.21   | 0.03  | 22       | 1.11    | 0.25   | 0.05  |
| <b>Demographics</b>                                                   |              |         |        |       |          |         |        |       |
| Educational level                                                     | 36           | 9.58    | 2.25   | 0.37  | 21       | 10.29   | 2.19   | 0.48  |
| BMI                                                                   | 36           | 24.50   | 5.55   | 0.92  | 22       | 24.25   | 5.60   | 1.19  |
| Handedness                                                            | 36           | 0.17    | 0.38   | 0.06  | 21       | 0.33    | 0.48   | 0.11  |
| VIQ prorated                                                          | 36           | 78.28   | 13.03  | 2.17  | 21       | 82.24   | 11.44  | 2.50  |
| PIQ                                                                   | 35           | 81.57   | 15.39  | 2.60  | 21       | 88.81   | 14.87  | 3.24  |
| FSIQ prorated                                                         | 35           | 77.86   | 13.47  | 2.28  | 21       | 83.71   | 12.91  | 2.82  |
| PIQ-VIQ discrepancy                                                   | 35           | 3.80    | 12.21  | 2.06  | 21       | 6.57    | 9.09   | 1.98  |

| eTable 3. Tests for control-by-FAE or FAS interaction of Returners vs. Non-returners                         |                      |              |                         |              |                              |             |                              |      |
|--------------------------------------------------------------------------------------------------------------|----------------------|--------------|-------------------------|--------------|------------------------------|-------------|------------------------------|------|
|                                                                                                              | Return vs. NonReturn |              | Return status+diagnosis |              | Return status* FAE diagnosis |             | Return status* FAS diagnosis |      |
|                                                                                                              | t                    | p            | t                       | p            | t                            | p           | t                            | p    |
| ICV                                                                                                          | 0.67                 | 0.51         | 0.35                    | 0.72         | 0.74                         | 0.46        | 0.51                         | 0.61 |
| <b>Gray matter volume</b>                                                                                    |                      |              |                         |              |                              |             |                              |      |
| Frontal                                                                                                      | 0.76                 | 0.45         | 0.44                    | 0.66         | 0.22                         | 0.82        | 0.71                         | 0.48 |
| Temporal                                                                                                     | 0.95                 | 0.34         | 0.71                    | 0.48         | 1.25                         | 0.21        | 0.61                         | 0.54 |
| Parietal                                                                                                     | 0.17                 | 0.86         | -0.07                   | 0.95         | -0.11                        | 0.92        | -0.68                        | 0.50 |
| Occipital                                                                                                    | -0.30                | 0.77         | -0.61                   | 0.54         | 0.18                         | 0.86        | 0.39                         | 0.70 |
| Insula                                                                                                       | 0.24                 | 0.81         | -0.08                   | 0.94         | 0.75                         | 0.45        | 1.30                         | 0.19 |
| Cingulate                                                                                                    | -0.03                | 0.98         | -0.31                   | 0.75         | 1.05                         | 0.29        | 1.14                         | 0.25 |
| <b>White matter volume</b>                                                                                   |                      |              |                         |              |                              |             |                              |      |
| Centrum semiovale                                                                                            | 0.19                 | 0.85         | -0.20                   | 0.85         | 0.48                         | 0.63        | 0.60                         | 0.55 |
| Corpus callosum                                                                                              | -0.58                | 0.56         | -0.99                   | 0.32         | -0.82                        | 0.41        | 0.33                         | 0.74 |
| Pons                                                                                                         | -0.24                | 0.81         | -0.69                   | 0.49         | 0.80                         | 0.42        | 0.32                         | 0.75 |
| <b>Ventricular volume</b>                                                                                    |                      |              |                         |              |                              |             |                              |      |
| Lateral                                                                                                      | 0.25                 | 0.80         | 0.26                    | 0.79         | -0.13                        | 0.90        | -0.11                        | 0.91 |
| Third                                                                                                        | 1.99                 | 0.05         | 1.93                    | 0.06         | 1.99                         | <b>0.05</b> | 0.81                         | 0.42 |
| <b>Demographics</b>                                                                                          |                      |              |                         |              |                              |             |                              |      |
| Educational level                                                                                            | 2.43                 | 0.02         | 2.15                    | 0.03         | 0.89                         | 0.38        | 0.29                         | 0.77 |
| BMI                                                                                                          | -0.73                | 0.46         | -0.66                   | 0.51         | -0.21                        | 0.84        | 0.13                         | 0.89 |
| Handedness                                                                                                   | 1.52                 | 0.13         | 1.73                    | 0.09         | 0.68                         | 0.50        | 1.32                         | 0.19 |
| VIQ prorated                                                                                                 | 3.30                 | <b>0.001</b> | 3.42                    | <b>0.001</b> | 0.58                         | 0.56        | -0.58                        | 0.56 |
| PIQ                                                                                                          | 3.33                 | <b>0.001</b> | 3.25                    | <b>0.001</b> | 0.16                         | 0.87        | -0.08                        | 0.93 |
| FSIQ prorated                                                                                                | 3.57                 | <b>0.000</b> | 3.82                    | <b>0.000</b> | 0.52                         | 0.61        | -0.41                        | 0.69 |
| PIQ-VIQ discrepancy                                                                                          | 0.20                 | 0.84         | 0.47                    | 0.64         | -0.57                        | 0.57        | 0.39                         | 0.69 |
| Bonferroni correct for 18 comparisons with $\alpha=.05$ (2-tailed) requires $p=.0028$ .                      |                      |              |                         |              |                              |             |                              |      |
| <b>Bold font:</b> Irrespective of diagnosis, Returners had, on average, higher IQ scores than Non-returners. |                      |              |                         |              |                              |             |                              |      |

### Group Differences between Non-returners and Returners

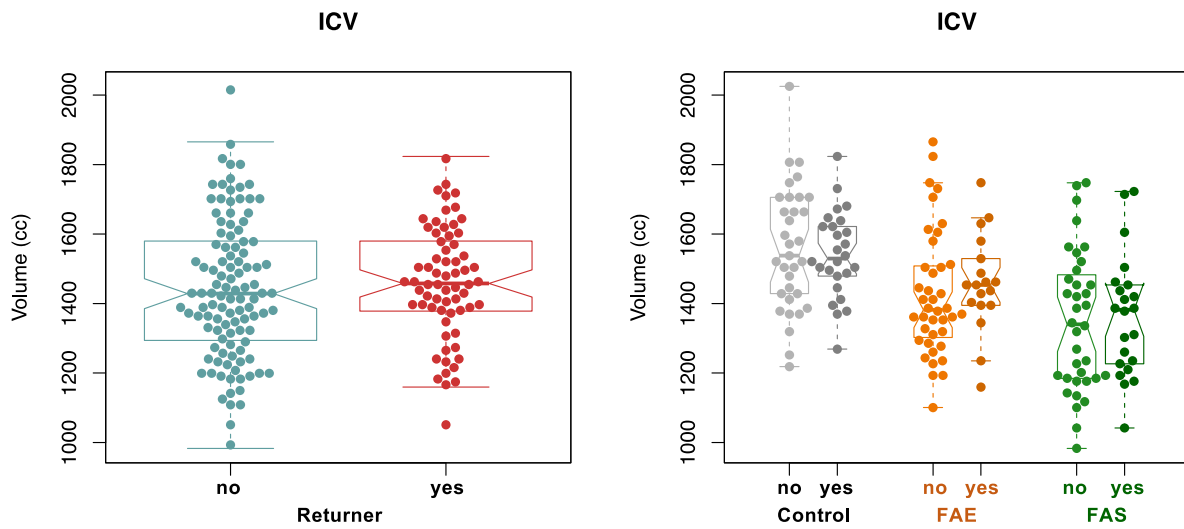

eFigure 1

## Group Differences between Non-returned and Returners

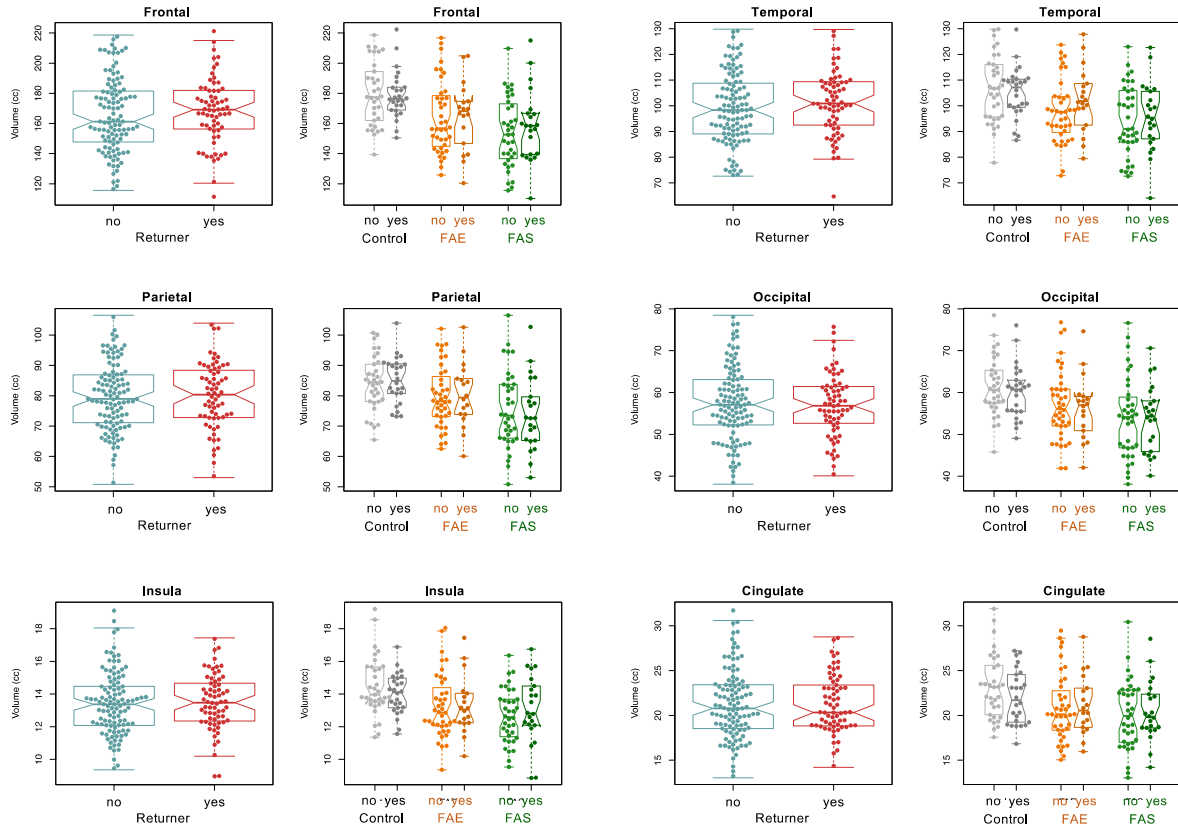

eFigure 2

## Group Differences between Non-returners and Returners

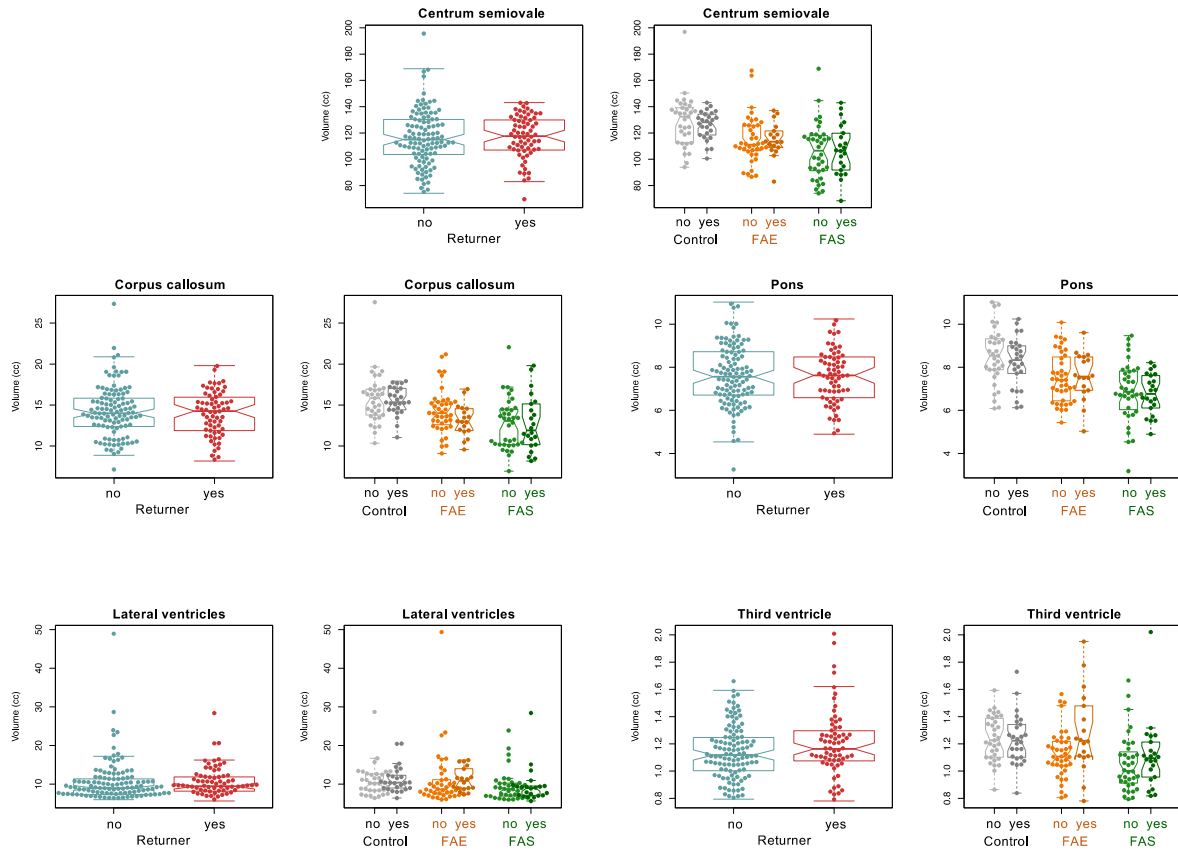

eFigure 3

### Group Differences between Non-returners and Returners

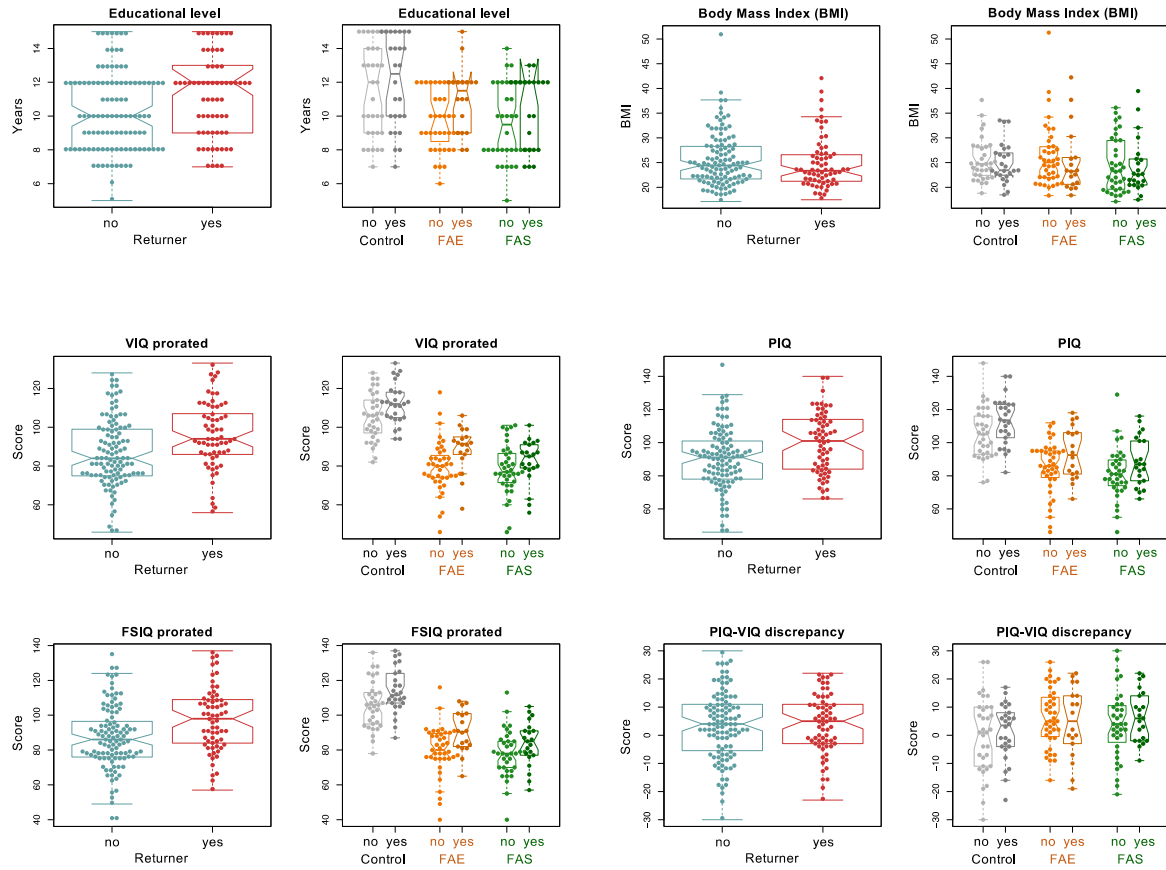

eFigure 4



## Group Differences in Cortical Gray Matter Volumes

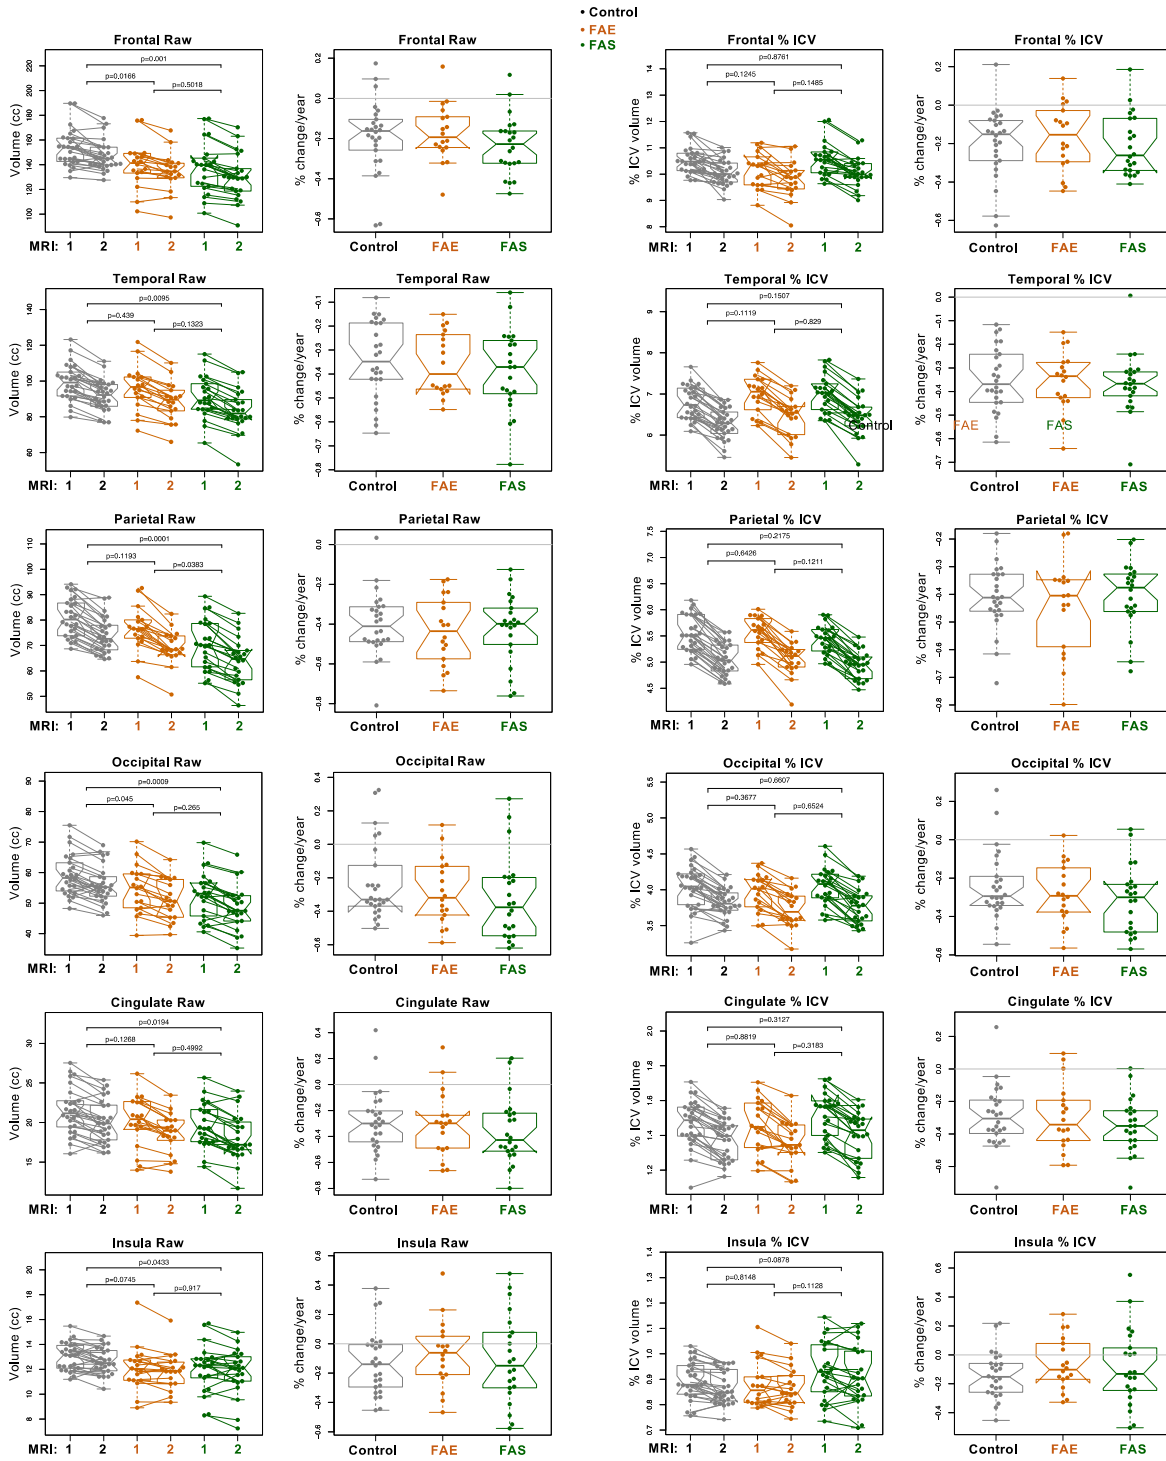

eFigure 5

### Group Differences in White Matter Volumes

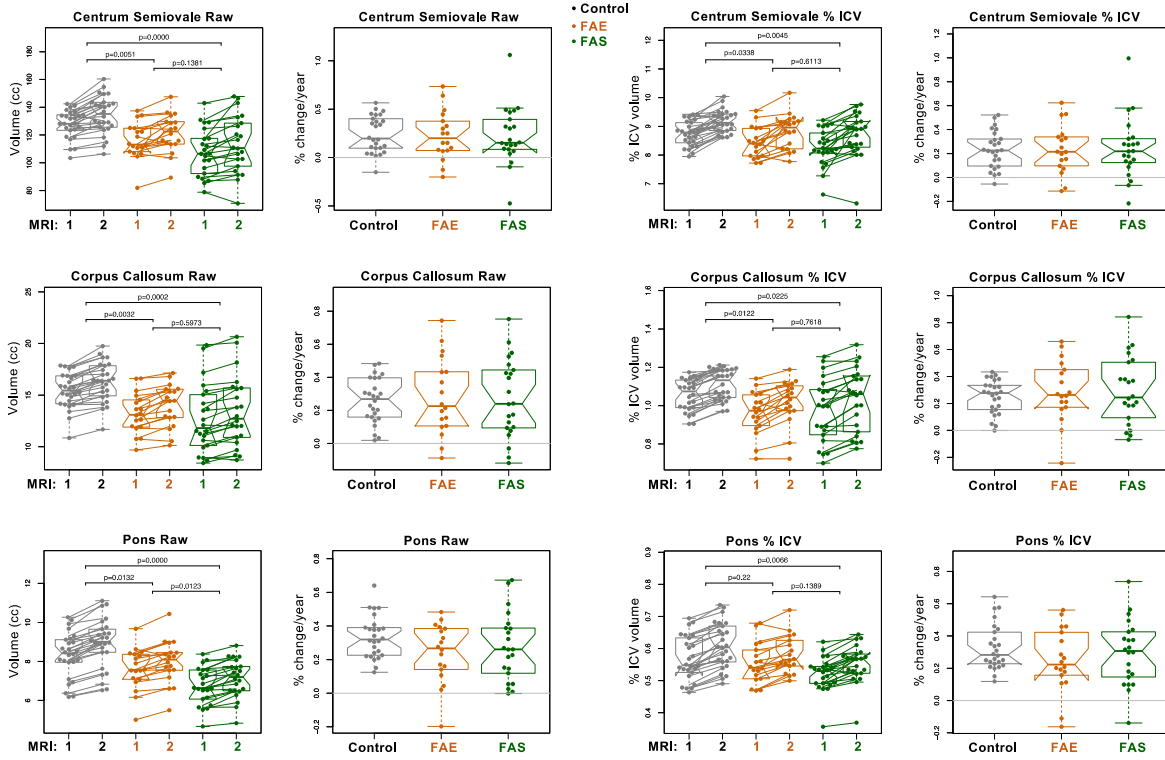

eFigure 6

## Group Differences in Cerebellar Volumes

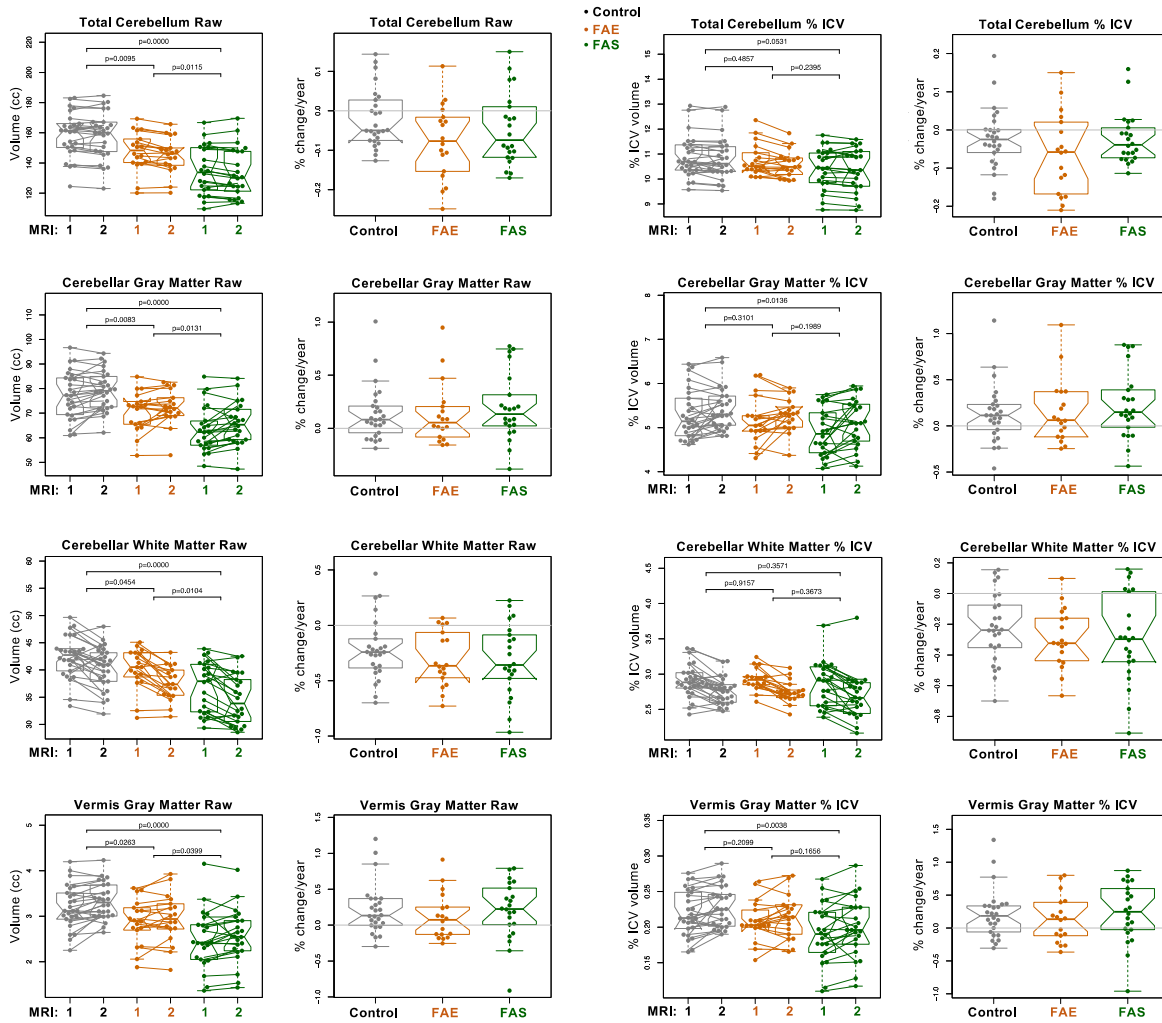

eFigure 7

## eFigure Captions

**eFigure 1.** Boxplots and beeswarm plots of intracranial volume (ICV) values for all returning vs. non-returning participants (left) and by group.

**eFigure 2.** Pairs of boxplots and beeswarm plots of volumes of each cortical region for all returning vs. non-returning participants (left) and by group (right).

**eFigure 3.** Pairs of boxplots and beeswarm plots of volumes of white matter and ventricular measures for all returning vs. non-returning participants (left) and by group (right).

**eFigure 4.** Pairs of boxplots and beeswarm plots of demographic data for all returning vs. non-returning participants (left) and by group (right). VIQ=Verbal Intelligence Quotient; PIQ=Performance Intelligence Quotient; FSIQ=Full Scale Intelligence Quotient.

**eFigure 5.** For each region, the pairs of boxplots on the left are raw (uncorrected) volumes of cortical regions for each MRI session of each participant in the three groups. The pairs of boxplots on the right are the same data expressed as a percent of ICV. The brackets at the top with *P*-values indicate the statistical results of group differences.

**eFigure 6.** For each region, the pairs of boxplots on the left are raw (uncorrected) volumes of white matter regions for each MRI session of each participant in the three groups. The pairs of boxplots on the right are the same data expressed as a percent of ICV. The brackets at the top with *P*-values indicate the statistical results of group differences.

**eFigure 7.** For each region, the pairs of boxplots on the left are raw (uncorrected) volumes of cerebellar regions for each MRI session of each participant in the three groups. The pairs of boxplots on the right are the same data expressed as a percent of ICV. The brackets at the top with *P*-values indicate the statistical results of group differences.
