# Supplementary material for: Brain Volume in Fetal Alcohol Spectrum Disorders Over a 20-Year Span
Source: PubMed Central journal article supplement (PMC10656646; doi:10.1001/jamanetworkopen.2023.43618), 2023-11-17
Supplement: jamanetwopen-e2343618-s002.pdf [file jamanetwopen-e2343618-s002.pdf]

## Data Sharing Statement

Pfefferbaum. Brain Volume in Fetal Alcohol Spectrum Disorders Over a 20-Year Span. *JAMA Netw Open*. Published November 17, 2023. doi:10.1001/jamanetworkopen.2023.43618

### Data

**Data available:** No

### Additional Information

**Explanation for why data not available:** Data from this study will not be shared. At the time MRI1 data were acquired, data-sharing agreements were not part of the informed consent process. Furthermore, this work is part of an ongoing longitudinal study on long-term effects of prenatal alcohol and further analyses need to be completed.
